# Supplementary material for: CD47 Expression in Non-Melanoma Skin Cancers and Its Clinicopathological Implications
Source: MDPI journal article supplement (doi:10.3390/diagnostics12081859), 2022-07-31
Supplement: s1 [file s1]

**Table S1.** Baseline characteristics of cases with basal cell carcinoma (n = 152).

| Baseline characteristics                          | Case No. (%)   |
|---------------------------------------------------|----------------|
| Age, median (range, year)                         | 68 (29-98)     |
| Sex                                               |                |
| Female                                            | 89 (58.6%)     |
| Male                                              | 63 (41.4%)     |
| Location                                          |                |
| Scalp                                             | 7 (4.6%)       |
| Face                                              | 122 (80.3%)    |
| Neck                                              | 3 (2.0%)       |
| Upper extremity                                   | 1 (0.7%)       |
| Lower extremity                                   | 3 (2.0%)       |
| Trunk                                             | 11 (7.2%)      |
| Urogenital region                                 | 5 (3.3%)       |
| Ulceration                                        |                |
| No                                                | 135 (88.8%)    |
| Yes                                               | 17 (11.2%)     |
| Local recurrence                                  |                |
| No                                                | 149 (98.0%)    |
| Yes                                               | 3 (2.0%)       |
| Tumor size, mean (range, cm)                      | 1.1 (0.25-5.0) |
| Histological subtypes                             |                |
| Superficial                                       | 10 (6.6%)      |
| Nodular                                           | 91 (59.9%)     |
| Micronodular                                      | 9 (5.9%)       |
| Infiltrating                                      | 2 (1.3%)       |
| Sclerosing/morphoeic                              | 1 (0.7%)       |
| Basosquamous                                      | 2 (1.3%)       |
| Fibroepithelial                                   | 1 (0.7%)       |
| Basal cell carcinoma with adnexal differentiation | 4 (2.6%)       |
| Mixed                                             | 32 (21.1%)     |
| Level of invasion                                 |                |
| Papillary dermis                                  | 11 (7.2%)      |
| Reticular dermis                                  | 107 (70.4%)    |
| Subcutis                                          | 22 (14.5%)     |
| Skeletal muscle                                   | 12 (7.9%)      |
| Perineural invasion                               |                |
| Not identified                                    | 148 (97.4%)    |
| Present                                           | 4 (2.6%)       |

**Table S2.** Baseline characteristics of cases with squamous cell carcinoma (n = 71).

| Baseline characteristics       | Case No. (%)   |
|--------------------------------|----------------|
| Age, median (range, year)      | 75 (33-96)     |
| Sex                            |                |
| Female                         | 35 (49.3%)     |
| Male                           | 36 (50.7%)     |
| Location                       |                |
| Scalp                          | 7 (9.9%)       |
| Face                           | 38 (53.5%)     |
| Neck                           | 2 (2.8%)       |
| Upper extremity                | 7 (9.9%)       |
| Lower extremity                | 12 (16.9%)     |
| Trunk                          | 5 (7.0%)       |
| Ulceration                     |                |
| No                             | 50 (70.4%)     |
| Yes                            | 21 (29.6%)     |
| Local recurrence               |                |
| No                             | 65 (91.0%)     |
| Yes                            | 6 (8.5%)       |
| Lymph node metastasis          |                |
| No                             | 67 (94.4%)     |
| Yes                            | 4 (5.6%)       |
| Tumor size, mean (range, cm)   | 2.5 (0.3-14.0) |
| Histological grade             |                |
| Well differentiated (G1)       | 51 (71.8%)     |
| Moderately differentiated (G2) | 17 (23.9%)     |
| Poorly differentiated (G3)     | 3 (4.2%)       |
| Level of invasion              |                |
| Papillary dermis               | 14 (19.7%)     |
| Reticular dermis               | 36 (50.7%)     |
| Subcutis                       | 14 (19.7%)     |
| Skeletal muscle or bone        | 7 (9.9%)       |
| Perineural invasion            |                |
| Not identified                 | 67 (94.4%)     |
| Present                        | 4 (5.6%)       |
